# Supplementary material
Source: publisher site journal article supplement (https://www.dovepress.com/article/301412)
Supplement: Supplementary file 1 [file get_supplementary_file.php]

**Supplementary figures and table**

**Supplementary material**


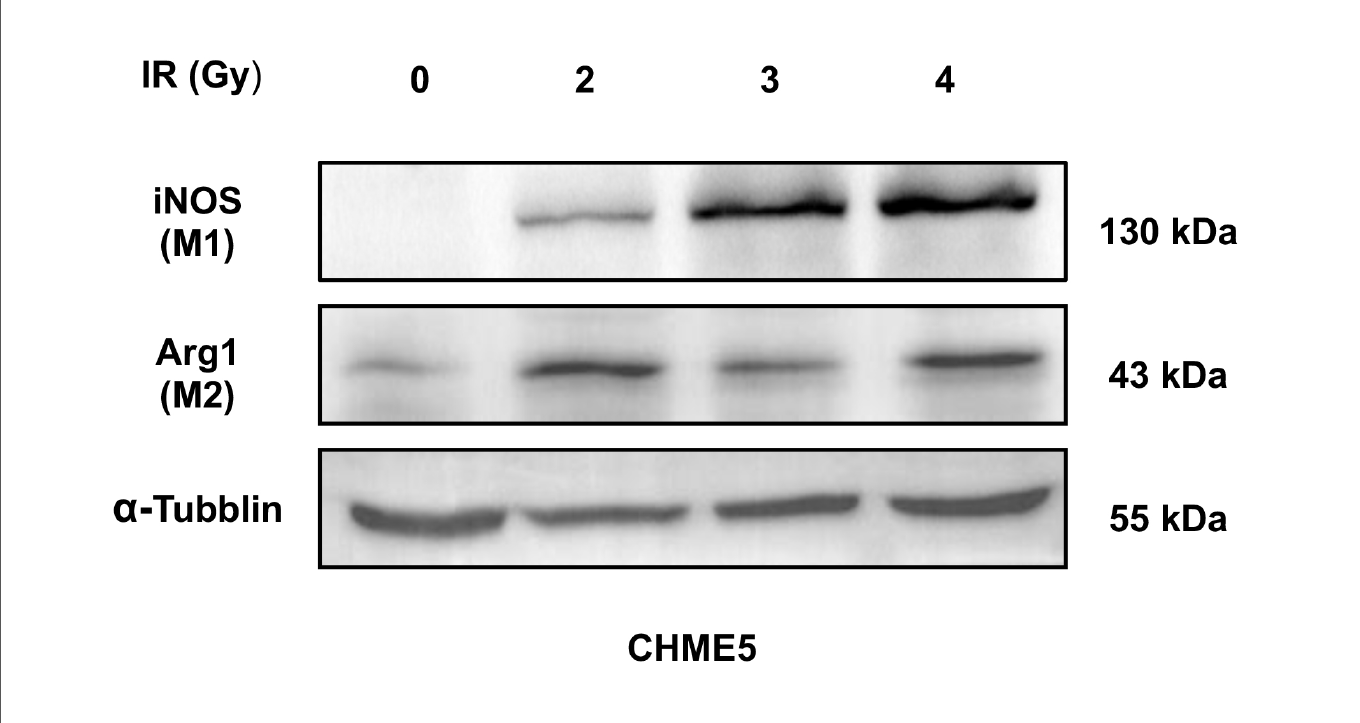


**Supplementary Figure 1** The original result of agarose gel electrophoresis for ARG1 in CHME5 cells was shown.


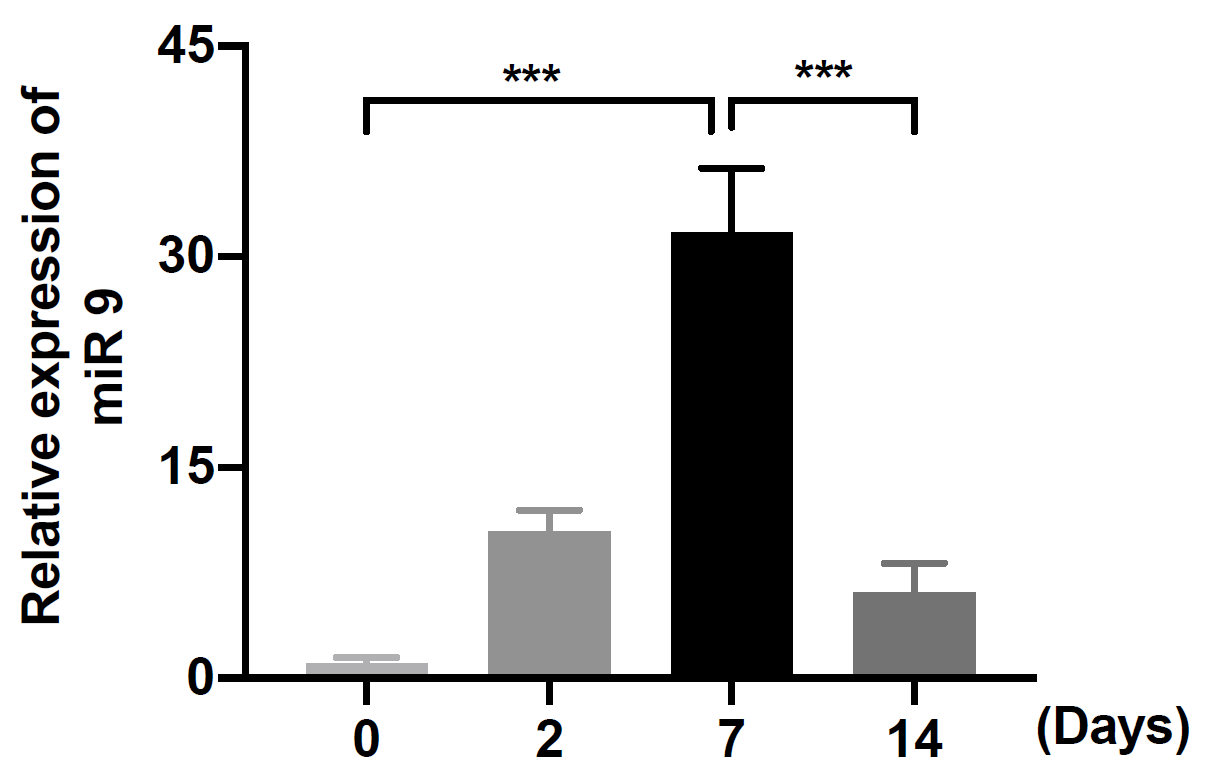


**Supplementary Figure 2** qRT-PCR results of miR-9 from mice brain tissue treated with irradiation at different time points.


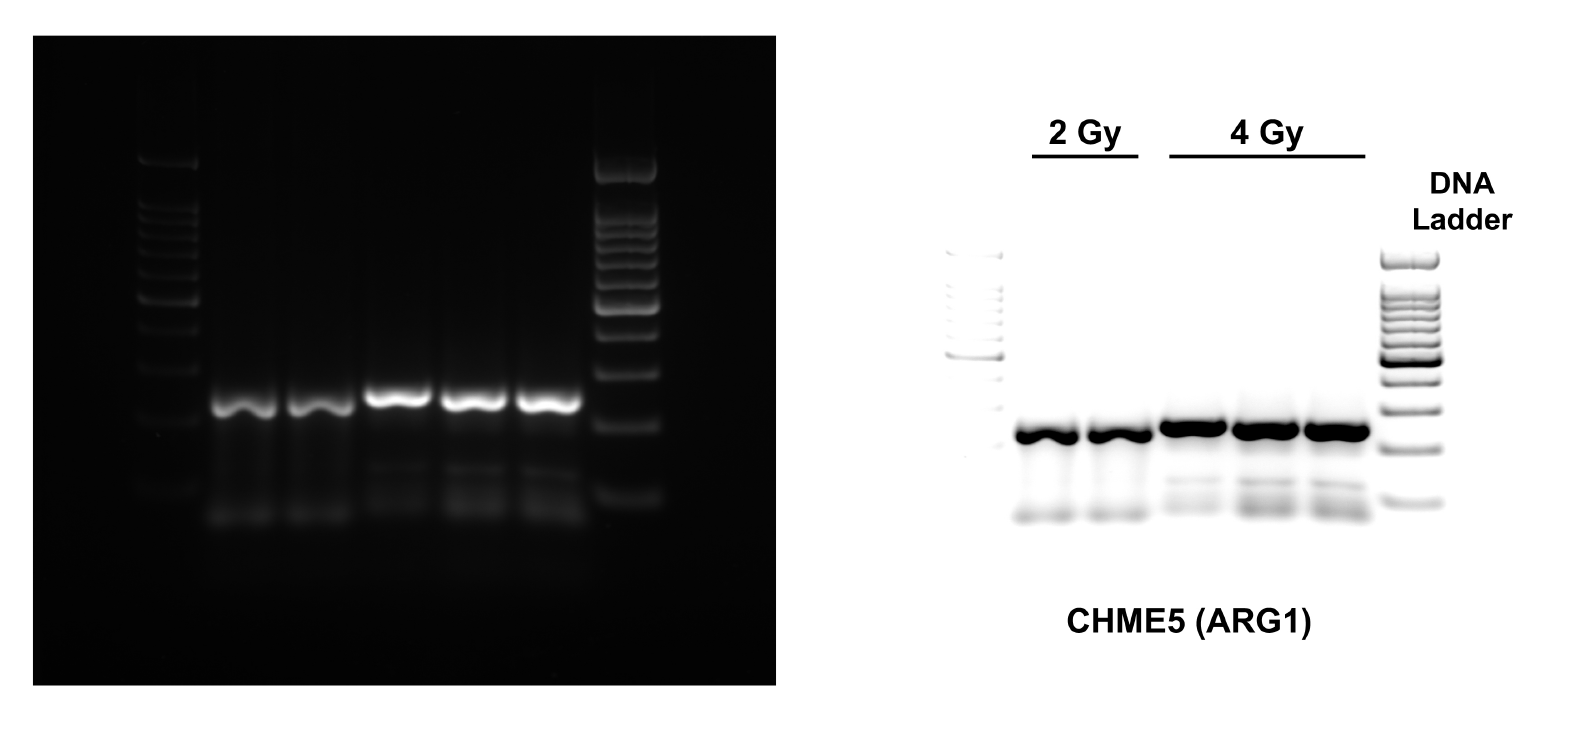


**Supplementary Figure 3** Western blots showed different levels of iNOS and Arg1 with different dose gradients.

**TABLE S1** **Primer sequences used for quantitative reverse transcription-polymerase chain reaction**

| Gene | Forward or Reverse | Sequences (5’-3’) |
| --- | --- | --- |
| GAPDH Forward GGAGCGAGATCCCTCCAAAAT  Reverse GGCTGTTGTCATACTTCTCATGG | | |
| Arg1 Forward GTGGAAACTTGCATGGACAAC  Reverse AATCCTGGCACATCGGGAATC | | |
| iNOS Forward TTCAGTATCACAACCTCAGCAAG  Reverse TGGACCTGCAAGTTAAAATCCC | | |
| IL1B Forward ATGATGGCTTATTACAGTGGCAA  Reverse GTCGGAGATTCGTAGCTGGA | | |
